# Supplementary material
Source: Springer Nature journal article supplement (https://www.springermedizin.de/resource/supplementary/13685_2014_31_MOESM4_ESM.pdf/9681246)
Supplement: MOESM4 [file 9681246]

Additional file 4. Tissue GSH, GSSG and GSH/GSSG ratios from Ames dwarf and wild type mice.

Values represent mean  $\pm$  SEM (n). P values represent results of a two-way ANOVA.

| <i>Genotype</i><br>tissue         | Dwarf<br>0.16%           | Wild type<br>0.16%       | Dwarf<br>0.43%           | Wild type<br>0.43%       | Dwarf<br>1.3%            | Wild type<br>1.3%        | P value  |        |             |
|-----------------------------------|--------------------------|--------------------------|--------------------------|--------------------------|--------------------------|--------------------------|----------|--------|-------------|
|                                   |                          |                          |                          |                          |                          |                          | Genotype | diet   | interaction |
| Liver<br>GSH<br>(n)               | 1499 $\pm$ 35<br>(13)    | 1123 $\pm$ 65<br>(13)    | 1789 $\pm$ 77<br>(12)    | 2824 $\pm$ 123<br>(12)   | 1740 $\pm$ 84<br>(11)    | 2677 $\pm$ 121<br>(13)   | <.0001   | <.0001 | <.0001      |
| Liver<br>GSSG<br>(n)              | 29.3 $\pm$ 1.9<br>(13)   | 30.5 $\pm$ 2.7<br>(13)   | 21.3 $\pm$ 1.0<br>(12)   | 44.8 $\pm$ 4.1<br>(12)   | 28.6 $\pm$ 3.5<br>(11)   | 46.4 $\pm$ 4.5<br>(13)   | .0001    | .0207  | .0307       |
| Liver<br>GSH:GSSG                 | 54.2 $\pm$ 4.3<br>(13)   | 38.9 $\pm$ 2.4<br>(13)   | 57.5 $\pm$ 2.6<br>(12)   | 69.8 $\pm$ 7.6<br>(12)   | 71.9 $\pm$ 10.0<br>(11)  | 63.8 $\pm$ 6.4<br>(13)   | .4537    | .0015  | .0652       |
| Kidney<br>GSH<br>(n)              | 23.07 $\pm$ 3.3<br>(16)  | 15.11 $\pm$ 0.5<br>(16)  | 39.9 $\pm$ 3.4<br>(12)   | 32.08 $\pm$ 3.0<br>(11)  | 29.66 $\pm$ 2.8<br>(11)  | 21.29 $\pm$ 1.4<br>(13)  | .0003    | <.0001 | .9953       |
| Kidney<br>GSSG<br>(n)             | 7.15 $\pm$ 0.3<br>(12)   | 6.48 $\pm$ 0.3<br>(16)   | 6.09 $\pm$ 0.4<br>(12)   | 6.18 $\pm$ 0.4<br>(11)   | 7.15 $\pm$ 0.6<br>(10)   | 6.91 $\pm$ 0.6<br>(13)   | .5138    | .2061  | .7409       |
| Kidney<br>GSH:GSSG                | 3.54 $\pm$ 0.5<br>(12)   | 2.45 $\pm$ 0.2<br>(16)   | 6.93 $\pm$ 0.8<br>(12)   | 6.31 $\pm$ 1.1<br>(11)   | 4.39 $\pm$ 0.4<br>(10)   | 3.25 $\pm$ 0.3<br>(13)   | .0702    | <.0001 | .9157       |
| Skeletal<br>Muscle<br>GSH<br>(n)  | 182.06 $\pm$ 9.5<br>(16) | 190.68 $\pm$ 9.0<br>(15) | 180.73 $\pm$ 7.3<br>(12) | 204.77 $\pm$ 6.2<br>(14) | 174.98 $\pm$ 5.8<br>(11) | 186.91 $\pm$ 7.7<br>(13) | .0279    | .3758  | .6014       |
| Skeletal<br>Muscle<br>GSSG<br>(n) | 21.29 $\pm$ 1.0<br>(16)  | 19.27 $\pm$ 1.5<br>(16)  | 17.75 $\pm$ 1.3<br>(12)  | 18.8 $\pm$ 0.8<br>(12)   | 18.25 $\pm$ 0.8<br>(11)  | 15.87 $\pm$ 1.2<br>(13)  | .2653    | .0230  | .3157       |
| Skeletal<br>Muscle<br>GSH:GSSG    | 8.85 $\pm$ 0.7<br>(16)   | 10.64 $\pm$ 1.0<br>(15)  | 10.79 $\pm$ 0.9<br>(12)  | 10.86 $\pm$ 0.4<br>(12)  | 9.76 $\pm$ 0.5<br>(11)   | 12.90 $\pm$ 1.3<br>(13)  | .0228    | .1709  | .2502       |
